# Supplementary material for: Lead-free organic–inorganic hybrid semiconductors and NLO switches tuned by dimensional design
Source: Royal Society of Chemistry journal article supplement (doi:10.1039/d1tc00278c), 2021-01-01
Supplement: d1tc00278c1.pdf [file d1tc00278c1.pdf]

## Supporting Information

### Lead-free organic-inorganic hybrid semiconductors and NLO switches tuned by dimensional design

*Hong-Yi Shen, Lei He, Ping-Ping Shi and Qiong Ye\**

(Ordered Matter Science Research Center, Jiangsu Key Laboratory for Science and Applications of Molecular Ferroelectrics, Southeast University, Nanjing, 211189, P.R. China)

#### Powder X-ray Diffraction

powder X-ray diffraction (PXRD) measurements on a PANalytical X'Pert PRO X-ray diffractometer were performed at room temperature. Diffraction patterns were recorded in the  $2\theta$  range  $5\text{--}50^\circ$  with a step size of  $0.02^\circ$ . Some medium sized (average  $2.5*0.5*0.7$  mm for **1** and  $3.3*2.3*0.8$  mm for **2**) and good quality crystals are ground into powder for PXRD testing. As shown in Fig. S1, PXRD patterns obtained at 298 K coincide well with the simulated patterns based on the crystal structures at room temperature, indicating the phase purity of the as-grown crystals of the two compounds.

#### Thermal Measurements

DSC measurement was performed by the Netzsch Model DSC 200 F3 instrument through the heating and cooling process. Some crystalline

samples of compounds **1** (16.4 mg), **2** (15.3 mg) were placed in aluminum crucible under a nitrogen atmosphere and were measured at a rate of 20 K/min over the temperature range of 150 K-403 K.

### **Single-Crystal X-ray Crystallography**

The crystal structures of **1** crystal at 143 K, 236 K and **2** crystal at 323 K were obtained by Mo K $\alpha$  radiation at the Bruker APEX II CCD detector. *Bruker SAINT* was used to perform data reduction and multi-scan absorption correction.

The structure of **1** crystal at 293 K was collected on a XtaLAB Synergy R, HyPix diffractometer with Mo K $\alpha$  radiation ( $\lambda = 0.71073 \text{ \AA}$ ) at different temperatures. *CrysAlisPro* 1.171.40.39a (Rigaku OD, 2019) was used to perform data reduction and multi-scan absorption correction.

The structure of **2** crystal at 173 K was obtained on a PHOTON 2 CMOS detector with Mo K $\alpha$  radiation. *Bruker SAINT* was used to perform data reduction and multi-scan absorption correction.

Crystal structures were solved with direct method, and then refined by the *SHELXLTL* software package (*SHELX-14*) using full-matrix least-squares refinements on  $F^2$ . Crystal data and refinement of **1** and **2** at different phases were given in Table S1. In addition, the size of the crystal **1** used to measure XRD is 0.04\*0.02\*0.02 mm, while **2** is 0.06\*0.06\*0.04 mm. Those crystals used to measure variable-temperature X-ray diffraction are

large enough and of good quality. CCDC 2056728, 2056730, 2056731, 2056732 and 2056733 contain the supplementary crystallographic data for this paper.

### **Second harmonic generation (SHG) measurement.**

Variable-temperature SHG experiments of **1** and **2** were performed on powder samples using the fundamental laser beam with a low divergence (pulsed Nd: YAG at a wavelength of 1064 nm, 5 ns pulse duration, 1.6 MW peak power, 10 Hz repetition rate). The numerical values of the nonlinear optical coefficients for SHG have been determined by comparison with a  $\text{KH}_2\text{PO}_4$  reference. The crystals used to measure SHG are medium in size (average  $2.7 \times 0.6 \times 0.6$  mm for **1** and  $3.8 \times 2.7 \times 0.9$  mm for **2**) and transparent without cracks.

### **Piezoelectric coefficients measurement.**

The piezoelectric coefficients of the samples were determined by a quasi-static  $d_{33}$  meter (Institute of Acoustics, Chinese Academy of sciences, model ZJ-4AN). The size and  $d_{33}$  of crystals **2** used to measure piezoelectric properties are listed in Table.S6 and those crystals are large enough and of good quality.

### **Dielectric Constant Measurements**

The temperature-dependent dielectric measurements were taken on a Tonghui TH2828A instrument, using pressed-powder tablets and observing any abnormal phenomenon between 113 K and 443 K within the frequency range of 500 Hz to 1 MHz. The pressed-powder pellets made by the samples of **1** and **2** were deposited with carbon conducting glue to act as the electrodes for dielectric measurements.

### **Ultraviolet–visible (UV–vis) absorption spectrum**

The plots of UV/Vis spectrum were measured on Shimadzu (Tokyo, Japan) UV-2600 spectrophotometer with powder samples of some single crystals at room temperature. BaSO<sub>4</sub> was used as the reference and powder of crystal **1** and **2** were prepared for the measurements

### **Thermogravimetric (TG)**

TG analyses were performed on a TAQ50 system with a heating rate of 10 K min<sup>-1</sup> in the air. Measurements were made at 300 K ~ 1050 K and the results showed that powder of crystal **1** and **2** began to decompose at 490 K and 422 K, respectively.

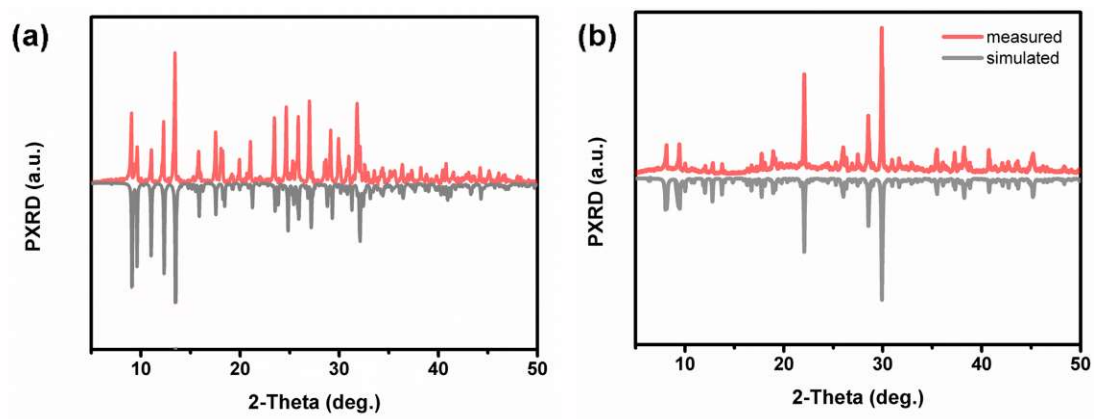

**Fig. S1** The experimental and simulated Powder X-ray diffraction (PXRD) patterns of **1** and **2** at room temperature, respectively.

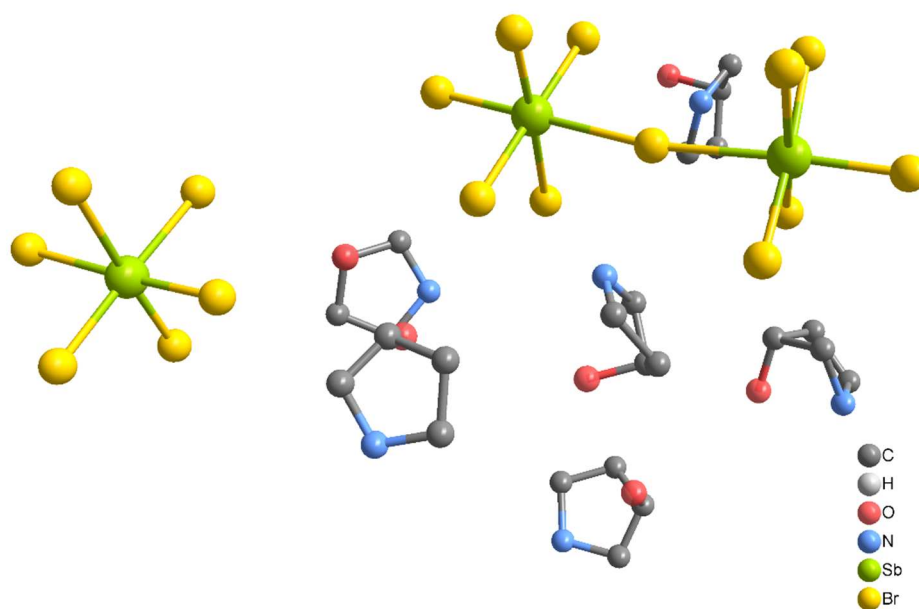

**Fig. S2** The asymmetry unit of **1** at 236 K. All hydrogen atoms are omitted for clarity.

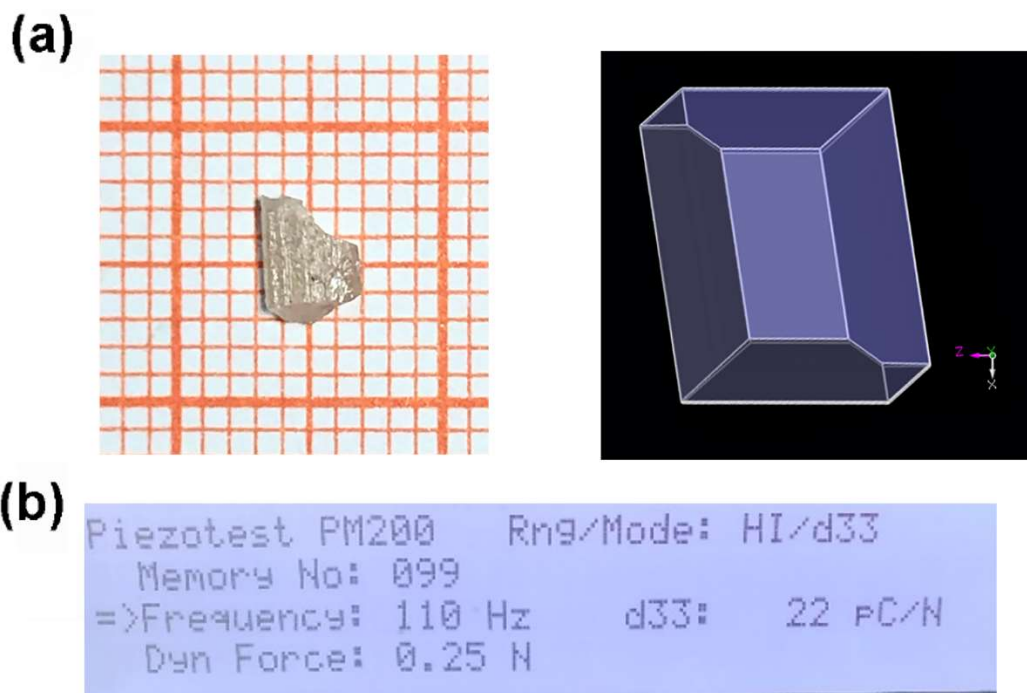

**Fig. S3** Piezoelectricity of **2**. (a) A picture of a large crystal and the simulative single crystal pattern of **2**. The largest natural face is (010)-face. (b) Recording the piezoelectric constant of a plate of **2** perpendicular to the largest natural face. The average size of the crystal **2** used to measure  $d_{33}$  is 4.12\*3.98\*2.75 mm.

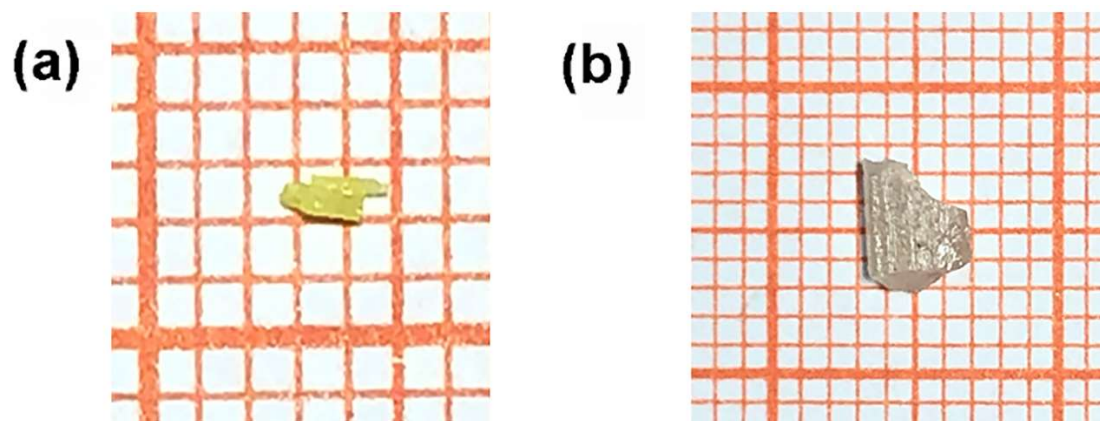

**Fig. S4** Obtained crystal photos of **1** and **2**.

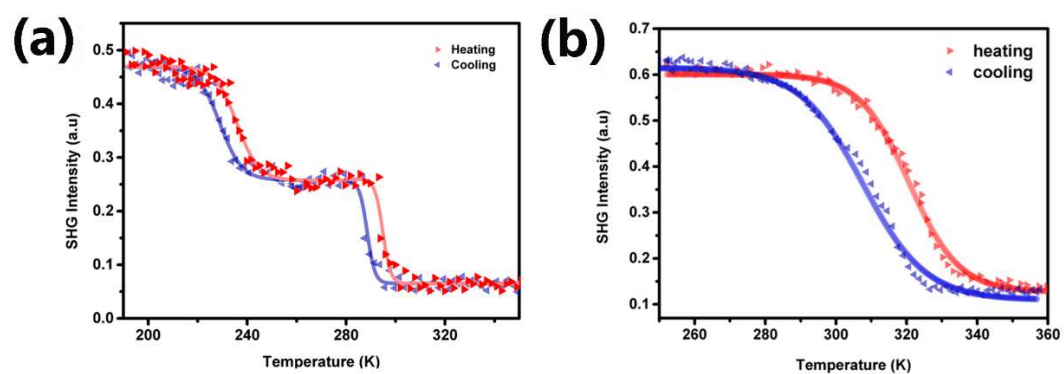

**Fig. S5** The complete cycles of the SHG switching properties of **1** and **2**.

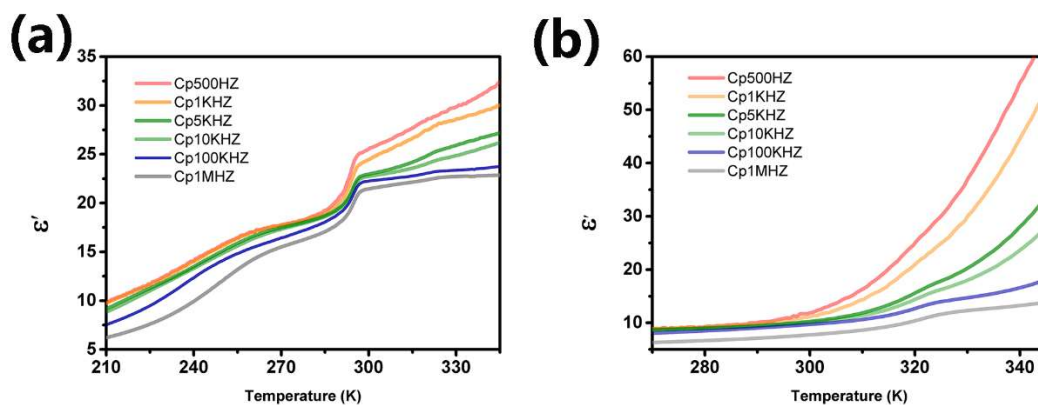

**Fig.S6** The real part ( $\epsilon'$ ) of pressed-powder pellet for **1** (a) and **2** (b) at 500 Hz, 1 kHz, 5 kHz, 10 kHz, 100 kHz and 1 MHz in cooling mode.

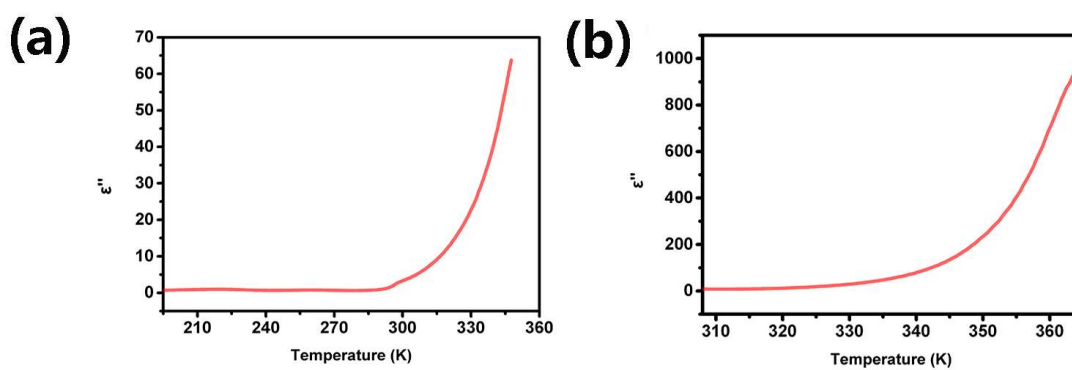

**Fig. S7** Imaginary parts of the dielectric constants of compounds **1**(a) and **2**(b) measured at 1 MHz frequency in cooling mode.



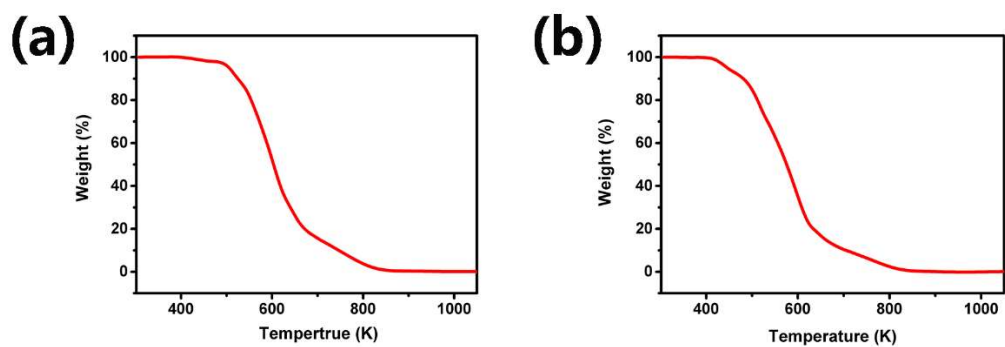

**Fig.S8** TG curves for **1** (a) and **2** (b).

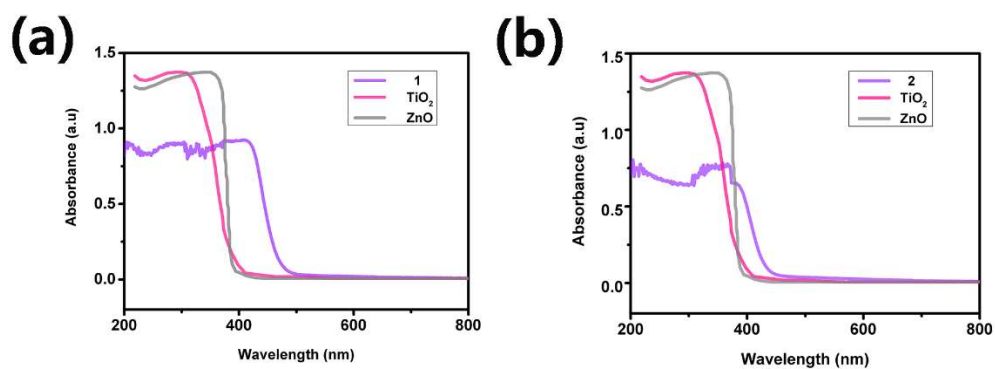

**Fig. S9** Comparisons of UV spectra of **1** and **2** compounds with direct band gap ZnO and indirect band gap TiO<sub>2</sub>.

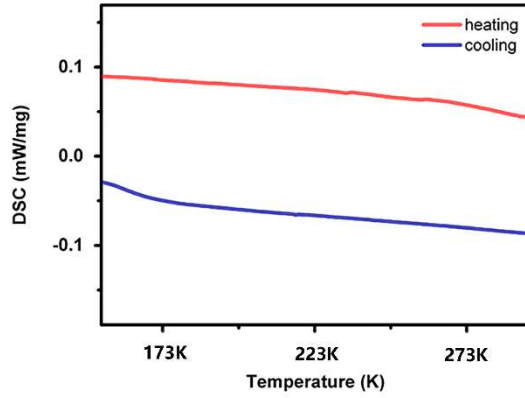

**Fig. S10** DSC traces for **2** below room temperature, indicating that there is no phase transition at low temperature.

Given space group  $P_{21}$  (belong to the point group 2) of **2** in the room temperature, the piezoelectric constant matrix  $[d]$  can be written as:

$$\begin{pmatrix} 0 & 0 & 0 & d_{14} & 0 & d_{16} \\ d_{21} & d_{22} & d_{23} & 0 & d_{25} & d_{26} \\ 0 & 0 & 0 & d_{34} & 0 & d_{36} \end{pmatrix} \quad (\text{s1})$$

And the matrix  $[d]$  of converse piezoelectric can be derived as:

$$\begin{pmatrix} 0 & d_{21} & 0 \\ 0 & d_{22} & 0 \\ 0 & d_{23} & 0 \\ d_{14} & 0 & d_{34} \\ 0 & d_{25} & 0 \\ d_{16} & d_{26} & d_{36} \end{pmatrix} \quad (\text{s2})$$

Compound **1** also has piezoelectric properties because it belongs to the 222 point group. While, the crystal exhibits a fine needle-like morphology and no instrument can test other piezoelectric coefficients, resulting the piezoelectric properties of **1** are not characterized.

**Table S1.** Crystal data and Refinement of **1** and **2** collected at different phases.

|                                                                      | (C <sub>4</sub> H <sub>10</sub> NO) <sub>2</sub> SbBr <sub>5</sub> ( <b>1</b> ) |               |               | (C <sub>4</sub> H <sub>10</sub> NO) <sub>5</sub> Sb <sub>4</sub> Br <sub>17</sub> ( <b>2</b> ) |               |
|----------------------------------------------------------------------|---------------------------------------------------------------------------------|---------------|---------------|------------------------------------------------------------------------------------------------|---------------|
| Temp (K)                                                             | 143                                                                             | 236           | 293           | 173                                                                                            | 323           |
| Cryst syst                                                           | orthorhombic                                                                    |               |               | monoclinic                                                                                     |               |
| space group                                                          | <i>P</i> 2 <sub>1</sub> 2 <sub>1</sub> 2 <sub>1</sub>                           |               |               | <i>P</i> 2 <sub>1</sub>                                                                        |               |
| Mr                                                                   | 2092.56                                                                         |               |               | 2285.99                                                                                        |               |
| a (Å)                                                                | 8.8393(19)                                                                      | 8.9134(18)    | 8.8663(8)     | 13.8913(4)                                                                                     | 14.064(4)     |
| b (Å)                                                                | 18.357(4)                                                                       | 18.389(3)     | 18.7062(16)   | 17.7216(5)                                                                                     | 17.655(5)     |
| c (Å)                                                                | 33.984(8)                                                                       | 34.305(6)     | 11.4394(10)   | 22.1687(6)                                                                                     | 11.292(3)     |
| $\beta$ (deg)                                                        | 90                                                                              | 90            | 90            | 98.078(1)                                                                                      | 81.036(5)     |
| V(Å <sup>3</sup> )                                                   | 5521(2)                                                                         | 5622.9(18)    | 1897.3(3)     | 5403.0(3)                                                                                      | 2769.6(13)    |
| Z                                                                    | 4                                                                               |               |               | 4                                                                                              | 2             |
| GOF                                                                  | 1.062                                                                           | 1.066         | 1.023         | 1.039                                                                                          | 1.038         |
| R <sub>1</sub> /wR <sub>2</sub> [ <i>I</i> >2 $\sigma$ ( <i>I</i> )] | 0.0677/0.1953                                                                   | 0.0470/0.1508 | 0.0702/0.2558 | 0.0473/0.0801                                                                                  | 0.0577/0.1791 |

**Table S2.** Selected bond angles [°] for **2** at different temperatures.

| <b>173k</b>                                         | <b>Angles (°)</b> | <b>323k</b>                                         | <b>Angles (°)</b> |
|-----------------------------------------------------|-------------------|-----------------------------------------------------|-------------------|
| Br <sub>20</sub> -Sb <sub>5</sub> -Br <sub>18</sub> | 89.25(6)          | Br <sub>19</sub> -Sb <sub>5</sub> -Br <sub>18</sub> | 85.56(3)          |
| Br <sub>19</sub> -Sb <sub>5</sub> -Br <sub>18</sub> | 86.77(6)          | Br <sub>19</sub> -Sb <sub>5</sub> -Br <sub>20</sub> | 91.31(3)          |
| Br <sub>19</sub> -Sb <sub>6</sub> -Br <sub>17</sub> | 93.36(6)          | Br <sub>18</sub> -Sb <sub>5</sub> -Br <sub>20</sub> | 89.49(3)          |
| Br <sub>19</sub> -Sb <sub>6</sub> -Br <sub>20</sub> | 86.83(5)          | Br <sub>17</sub> -Sb <sub>6</sub> -Br <sub>20</sub> | 85.48(3)          |
| Br <sub>17</sub> -Sb <sub>6</sub> -Br <sub>20</sub> | 86.62(6)          | Br <sub>17</sub> -Sb <sub>6</sub> -Br <sub>19</sub> | 86.48(2)          |
| Br <sub>17</sub> -Sb <sub>7</sub> -Br <sub>18</sub> | 85.17(6)          | Br <sub>20</sub> -Sb <sub>6</sub> -Br <sub>19</sub> | 88.71(2)          |
| Br <sub>17</sub> -Sb <sub>7</sub> -Br <sub>20</sub> | 89.31(6)          | Br <sub>17</sub> -Sb <sub>7</sub> -Br <sub>18</sub> | 85.66(2)          |
| Br <sub>18</sub> -Sb <sub>7</sub> -Br <sub>20</sub> | 85.85(6)          | Br <sub>17</sub> -Sb <sub>7</sub> -Br <sub>20</sub> | 84.61(3)          |
| Br <sub>18</sub> -Sb <sub>8</sub> -Br <sub>19</sub> | 85.70(6)          | Br <sub>18</sub> -Sb <sub>7</sub> -Br <sub>20</sub> | 88.19(2)          |
| Br <sub>18</sub> -Sb <sub>8</sub> -Br <sub>17</sub> | 82.24(6)          | Br <sub>17</sub> -Sb <sub>8</sub> -Br <sub>18</sub> | 89.66(3)          |
| Br <sub>19</sub> -Sb <sub>8</sub> -Br <sub>17</sub> | 88.02(6)          | Br <sub>17</sub> -Sb <sub>8</sub> -Br <sub>19</sub> | 90.69(3)          |
| Sb <sub>4</sub> -Br <sub>1</sub> -Sb <sub>3</sub>   | 92.40(5)          | Br <sub>18</sub> -Sb <sub>8</sub> -Br <sub>19</sub> | 86.81(3)          |
| Sb <sub>7</sub> -Br <sub>17</sub> -Sb <sub>6</sub>  | 93.75(6)          | Sb <sub>8</sub> -Br <sub>17</sub> -Sb <sub>6</sub>  | 92.96(3)          |
| Sb <sub>7</sub> -Br <sub>17</sub> -Sb <sub>8</sub>  | 94.88(6)          | Sb <sub>7</sub> -Br <sub>17</sub> -Sb <sub>8</sub>  | 92.76(3)          |
| Sb <sub>6</sub> -Br <sub>17</sub> -Sb <sub>8</sub>  | 86.39(6)          | Sb <sub>6</sub> -Br <sub>17</sub> -Sb <sub>7</sub>  | 96.20(3)          |
| Sb <sub>8</sub> -Br <sub>18</sub> -Sb <sub>5</sub>  | 94.60(6)          | Sb <sub>8</sub> -Br <sub>18</sub> -Sb <sub>5</sub>  | 93.60(3)          |
| Sb <sub>8</sub> -Br <sub>18</sub> -Sb <sub>7</sub>  | 97.70(6)          | Sb <sub>8</sub> -Br <sub>18</sub> -Sb <sub>7</sub>  | 91.49(3)          |
| Sb <sub>5</sub> -Br <sub>18</sub> -Sb <sub>7</sub>  | 91.99(6)          | Sb <sub>5</sub> -Br <sub>18</sub> -Sb <sub>7</sub>  | 91.73(3)          |
| Sb <sub>6</sub> -Br <sub>19</sub> -Sb <sub>5</sub>  | 93.59(7)          | Sb <sub>8</sub> -Br <sub>19</sub> -Sb <sub>5</sub>  | 93.76(3)          |
| Sb <sub>6</sub> -Br <sub>19</sub> -Sb <sub>8</sub>  | 91.24(6)          | Sb <sub>8</sub> -Br <sub>19</sub> -Sb <sub>6</sub>  | 89.53(2)          |

|                                                    |          |                                                    |          |
|----------------------------------------------------|----------|----------------------------------------------------|----------|
| Sb <sub>5</sub> -Br <sub>19</sub> -Sb <sub>8</sub> | 92.69(6) | Sb <sub>5</sub> -Br <sub>19</sub> -Sb <sub>6</sub> | 90.06(2) |
| Sb <sub>5</sub> -Br <sub>20</sub> -Sb <sub>7</sub> | 92.47(6) | Sb <sub>5</sub> -Br <sub>20</sub> -Sb <sub>6</sub> | 89.65(3) |
| Sb <sub>5</sub> -Br <sub>20</sub> -Sb <sub>6</sub> | 90.66(6) | Sb <sub>5</sub> -Br <sub>20</sub> -Sb <sub>7</sub> | 90.31(3) |
| Sb <sub>7</sub> -Br <sub>20</sub> -Sb <sub>6</sub> | 90.32(6) | Sb <sub>6</sub> -Br <sub>20</sub> -Sb <sub>7</sub> | 93.72(3) |
| Sb <sub>4</sub> -Br <sub>1</sub> -Sb <sub>2</sub>  | 89.59(6) |                                                    |          |
| Sb <sub>3</sub> -Br <sub>1</sub> -Sb <sub>2</sub>  | 88.04(6) |                                                    |          |
| Sb <sub>1</sub> -Br <sub>2</sub> -Sb <sub>3</sub>  | 91.05(6) |                                                    |          |
| Sb <sub>1</sub> -Br <sub>2</sub> -Sb <sub>4</sub>  | 92.21(6) |                                                    |          |
| Sb <sub>3</sub> -Br <sub>2</sub> -Sb <sub>4</sub>  | 95.75(5) |                                                    |          |
| Sb <sub>2</sub> -Br <sub>3</sub> -Sb <sub>1</sub>  | 94.20(7) |                                                    |          |
| Sb <sub>2</sub> -Br <sub>3</sub> -Sb <sub>4</sub>  | 90.78(6) |                                                    |          |
| Sb <sub>1</sub> -Br <sub>3</sub> -Sb <sub>4</sub>  | 88.56(6) |                                                    |          |
| Sb <sub>3</sub> -Br <sub>4</sub> -Sb <sub>1</sub>  | 89.81(6) |                                                    |          |
| Sb <sub>3</sub> -Br <sub>4</sub> -Sb <sub>2</sub>  | 91.71(6) |                                                    |          |
| Sb <sub>1</sub> -Br <sub>4</sub> -Sb <sub>2</sub>  | 92.68(6) |                                                    |          |

**Table S3** Selected Sb-Br bonds for **2** at 173 K and 323 K.

| Sb-Br bonds (Å)                   | 173 K    | 323 K    |
|-----------------------------------|----------|----------|
| Sb <sub>5</sub> -Br <sub>18</sub> | 3.153(2) | 3.184(1) |
| Sb <sub>5</sub> -Br <sub>19</sub> | 3.120(2) | 3.151(1) |
| Sb <sub>5</sub> -Br <sub>20</sub> | 3.099(2) | 3.215(9) |
| Sb <sub>6</sub> -Br <sub>17</sub> | 3.223(2) | 3.171(1) |
| Sb <sub>6</sub> -Br <sub>19</sub> | 3.079(2) | 3.276(1) |
| Sb <sub>6</sub> -Br <sub>20</sub> | 3.253(2) | 3.263(1) |
| Sb <sub>7</sub> -Br <sub>17</sub> | 3.082(2) | 3.199(1) |
| Sb <sub>7</sub> -Br <sub>18</sub> | 3.211(3) | 3.213(1) |
| Sb <sub>7</sub> -Br <sub>20</sub> | 3.238(3) | 3.261(1) |
| Sb <sub>8</sub> -Br <sub>17</sub> | 3.367(2) | 3.065(9) |
| Sb <sub>8</sub> -Br <sub>18</sub> | 3.102(2) | 3.118(1) |
| Sb <sub>8</sub> -Br <sub>19</sub> | 3.233(3) | 3.144(1) |

**Table S4.** Hydrogen bonds for **2** at 173 K.

| D—H···Acceptor                                                      | D—H   | H···A | D···A | D—H···A |
|---------------------------------------------------------------------|-------|-------|-------|---------|
| N <sub>1A</sub> -H <sub>1AD</sub> ···Br <sub>33</sub> <sup>#1</sup> | 0.911 | 2.399 | 3.281 | 163.11  |
| N <sub>1B</sub> -H <sub>1BD</sub> ···Br <sub>33</sub> <sup>#2</sup> | 0.917 | 2.319 | 3.235 | 178.55  |
| N <sub>1F_c</sub> -H <sub>1FD_c</sub> ···Br <sub>33</sub>           | 0.911 | 2.439 | 3.283 | 154.13  |
| N <sub>1U_d</sub> -H <sub>1UD_d</sub> ···Br <sub>33</sub>           | 0.910 | 2.450 | 3.317 | 159.41  |
| N <sub>1T_h</sub> -H <sub>1TD_h</sub> ···Br <sub>44_h</sub>         | 0.906 | 2.774 | 3.545 | 143.66  |

Symmetry transformations used to generate equivalent atoms: [#1] = x, y-1, z-1; [#2] = -x+1, y-1/2, -z+2

**Table S5.** Hydrogen bonds for **2** at 323 K.

| D—H···Acceptor                                                    | D—H   | H···A | D···A | D—H···A |
|-------------------------------------------------------------------|-------|-------|-------|---------|
| N <sub>1</sub> -H <sub>1B</sub> ···Br <sub>33</sub> <sup>#1</sup> | 0.890 | 2.684 | 3.569 | 172.57  |
| N <sub>3</sub> -H <sub>3B</sub> ···Br <sub>33</sub>               | 0.890 | 2.184 | 3.073 | 176.56  |
| N <sub>4</sub> -H <sub>4B</sub> ···Br <sub>33</sub>               | 0.890 | 3.113 | 3.675 | 123.09  |
| N <sub>5</sub> -H <sub>5B</sub> ···Br <sub>33</sub> <sup>#2</sup> | 0.890 | 2.721 | 3.466 | 141.97  |

Symmetry transformations used to generate equivalent atoms: [#1] = -x+1, y+1/2, -z+1, -z+1; [#2] = -x+1, y+1/2, -z+1

**Table S6** The sizes of crystals **2** for measuring piezoelectric properties.

(The average size of the crystal **2** used to measure  $d_{33}$  is 4.12\*4.05\*2.77 mm)

|          | <i>a</i> | <i>b</i> | <i>c</i> | <i>d</i> <sub>33</sub> |
|----------|----------|----------|----------|------------------------|
| Sample 1 | 4.13     | 4.02     | 2.85     | 22                     |
| Sample 2 | 4.22     | 3.94     | 2.83     | 22                     |
| Sample 3 | 4.09     | 4.08     | 3.12     | 22                     |
| Sample 4 | 3.89     | 3.78     | 2.25     | 19                     |
| Sample 5 | 4.28     | 4.43     | 2.78     | 26                     |
